# Supplementary material for: A dual enhanced anti-bacterial strategy based on high chlorin e6-loaded polyethyleneimine functionalized graphene
Source: Royal Society of Chemistry journal article supplement (doi:10.1039/d0ra07976f), 2020-12-24
Supplement: d0ra07976f1.pdf [file d0ra07976f1.pdf]

# Electronic Supplementary Information

## **Dual Enhanced Anti-Bacterial Strategy Based on High Chlorin e6 Loaded**

### **Polyethyleneimine Functionalized Graphene**

Jiangxia Wang,<sup>a</sup> Yuting Yang,<sup>a</sup> Yuanliang Xu,<sup>b</sup> Lifeng Zhao,<sup>a</sup> Lu Wang,<sup>a</sup> Zhengzhi Yin,<sup>c</sup> Huiming Li,<sup>\*b</sup> Huan Tan<sup>\*a</sup> and Kunping Liu<sup>\*a</sup>

<sup>a</sup>Key Laboratory of Medicinal and Edible Plants Resources Development of Sichuan Education Department, Sichuan Industrial Institute of Antibiotics, Chengdu University, Chengdu, 610106, China

<sup>b</sup>College of Food and Biological Engineering, Chengdu University, Chengdu, 610106, China

<sup>c</sup>College of Biological, Chemical Sciences and Engineering, Jiaying University, Jiaying, 314001, China

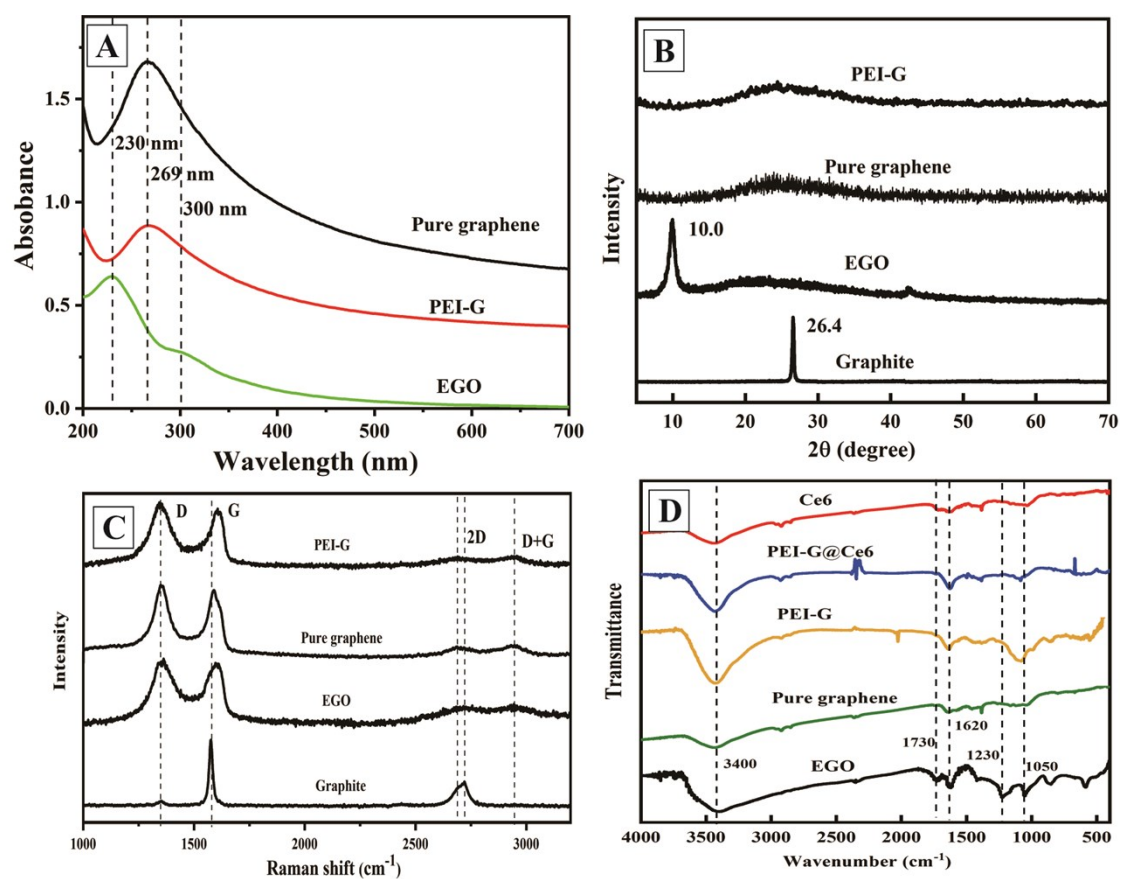

**Fig. S1** UV-Vis (A) spectrum of EGO, pure graphene and PEI-G, XRD (B), Raman (C) spectrum of Graphite, EGO, pure graphene and PEI-G, FT-IR (D) spectrum of EGO, pure graphene, PEI-G, PEI-G@Ce6 and Ce6.

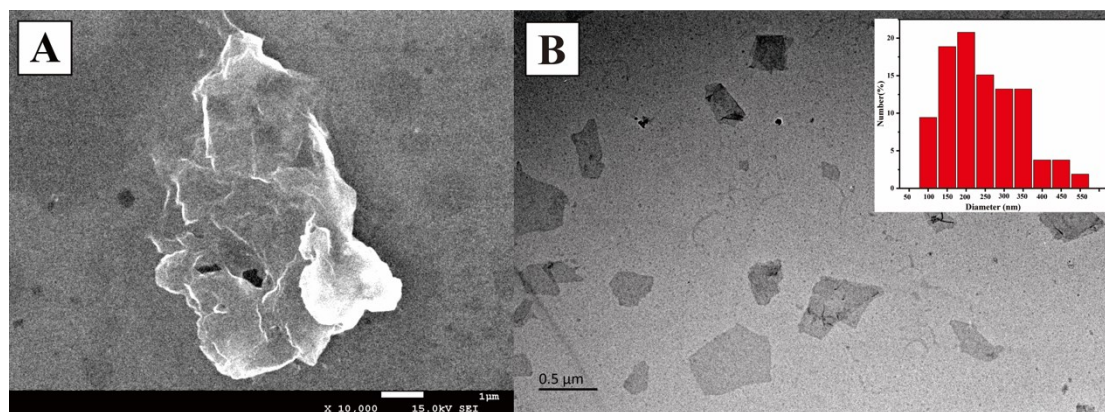

**Fig. S2** SEM (A) and TEM (B) images of PEI-G. Inset of B was the size distribution of PEI-G.

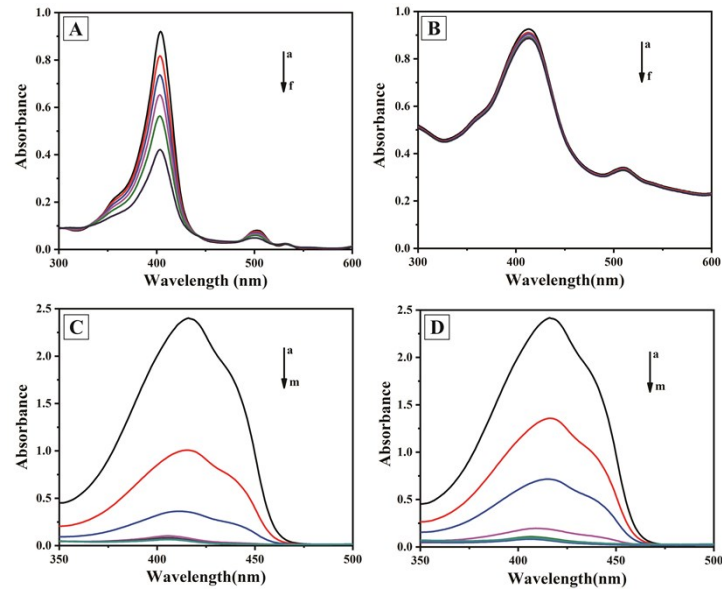

**Fig. S3** UV-Vis spectrum of (A) Ce6, (B) PEI-G@Ce6 in photostability and (C) Ce6, (D) PEI-G@Ce6 incubated with DPBF for singlet oxygen generation

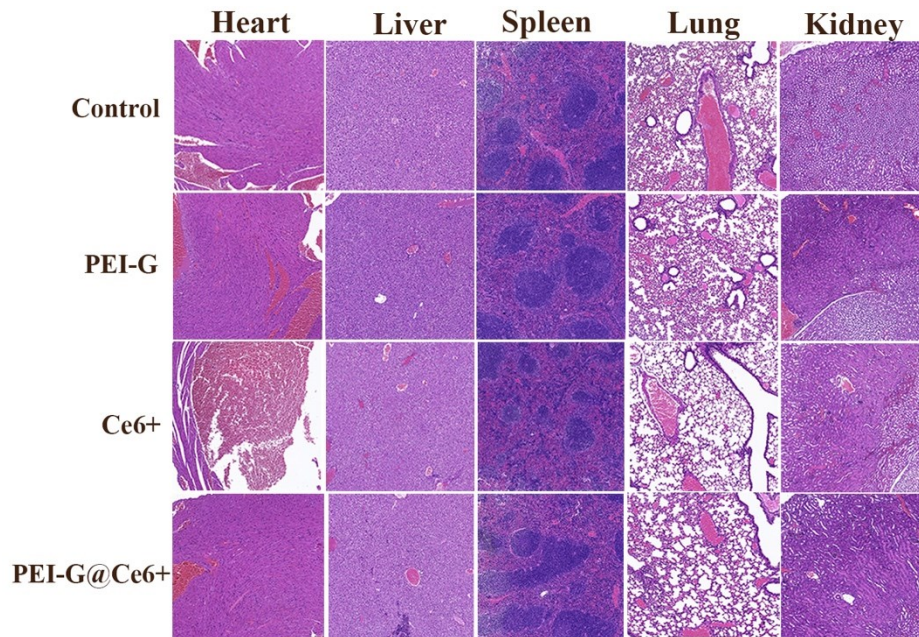

**Fig. S4** Haematoxylin and eosin stain images of the major organs of mice in PEI-G@Ce6 group (heart, liver, spleen, lung and kidney)

**Table S1** Comparison of Ce6 loading capacity with other nanomaterials reported in published articles

| Nanomaterials                       | Ce6 loading capacity (%) | References |
|-------------------------------------|--------------------------|------------|
| Magnetic polydopamine nanoparticles | 18.03%                   | 1          |
| Silica nanoparticles                | 7.80%                    | 2          |
| Poly (dopamine) nanospheres         | 20.44%                   | 3          |
| PEGylated graphene oxide            | 15.00%                   | 4          |
| Black Phosphorus Nanosheets         | 12.80%                   | 5          |
| Pd nanosheets                       | 5.25%                    | 6          |
| PEI-G                               | 32.91%                   | This work  |

**Table S2** Wound healing activity of PEI-G, Ce6 and PEI-G@Ce6 in mice

| Group      | Wound size (mm) and Percentage of wound healing at |                     |                     |                      |
|------------|----------------------------------------------------|---------------------|---------------------|----------------------|
|            | 1 <sup>th</sup> day                                | 7 <sup>th</sup> day | 9 <sup>th</sup> day | 13 <sup>th</sup> day |
| Control    | 100.00±0.00                                        | 89.73±1.8           | 86.26±2.3           | 69.74±2.5            |
|            | 0%                                                 | 10.27%              | 13.74%              | 30.26%               |
| PEI-G      | 100.00±0.00                                        | 89.72±0.9           | 83.95±1.5           | 60.58±2.0            |
|            | 0%                                                 | 10.28%              | 16.05%              | 39.42%               |
| Ce6+       | 100.00±0.00                                        | 87.25±2.2           | 80.27±2.6           | 49.95±2.8            |
|            | 0%                                                 | 12.75%              | 19.73%              | 50.46%               |
| PEI-G@Ce6+ | 100.00±0.00                                        | 56.25±2.6           | 53.22±1.8           | 10.35±1.7            |
|            | 0%                                                 | 43.75%              | 46.78%              | 89.65%               |

## References

1. C. Lu, F. Sun, Y. Liu, Y. Xiao, Y. Qiu, H. Mu and J. Duan, *Carbohydrate Polymers*, 2019, **218**, 289-298.
2. J.-f. Lin, J. Li, A. Gopal, T. Munshi, Y.-w. Chu, J.-x. Wang, T.-t. Liu, B. Shi, X. Chen and L. Yan, *Chemical Communications*, 2019, **55**, 2656-2659.
3. D. Zhang, M. Wu, Y. Zeng, L. Wu, Q. Wang, X. Han, X. Liu and J. Liu, *ACS applied materials & interfaces*, 2015, **7**, 8176-8187.
4. B. Tian, C. Wang, S. Zhang, L. Feng and Z. Liu, *ACS Nano*, 2011, **5**, 7000-7009.
5. X. Yang, D. Wang, Y. Shi, J. Zou, Q. Zhao, Q. Zhang, W. Huang, J. Shao, X. Xie and X. Dong, *ACS applied materials & interfaces*, 2018, **10**, 12431-12440.
6. Z. Zhao, S. Shi, Y. Huang, S. Tang and X. Chen, *ACS applied materials & interfaces*, 2014, **6**, 8878-8885.
